# Supplementary material for: Temporal dynamics of the lung and plasma viromes in lung transplant recipients
Source: PLOS journal article supplement (doi:10.1371/journal.pone.0200428), 2018-07-06
Supplement: S3 (10.1371/journal.pone.0200428.s003) [file journal.pone.0200428.s003]

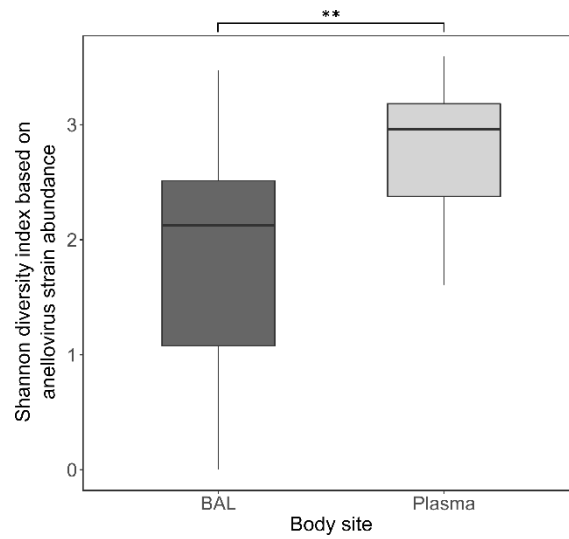

Figure S2. Shannon diversity index for BAL and plasma samples from 7 follow up LTRs (\*\* $p < 0.001$ ; Wilcoxon rank sum test).
