# Supplementary material for: Temporal dynamics of the lung and plasma viromes in lung transplant recipients
Source: PLOS journal article supplement (doi:10.1371/journal.pone.0200428), 2018-07-06
Supplement: S4 (10.1371/journal.pone.0200428.s004) [file journal.pone.0200428.s004]

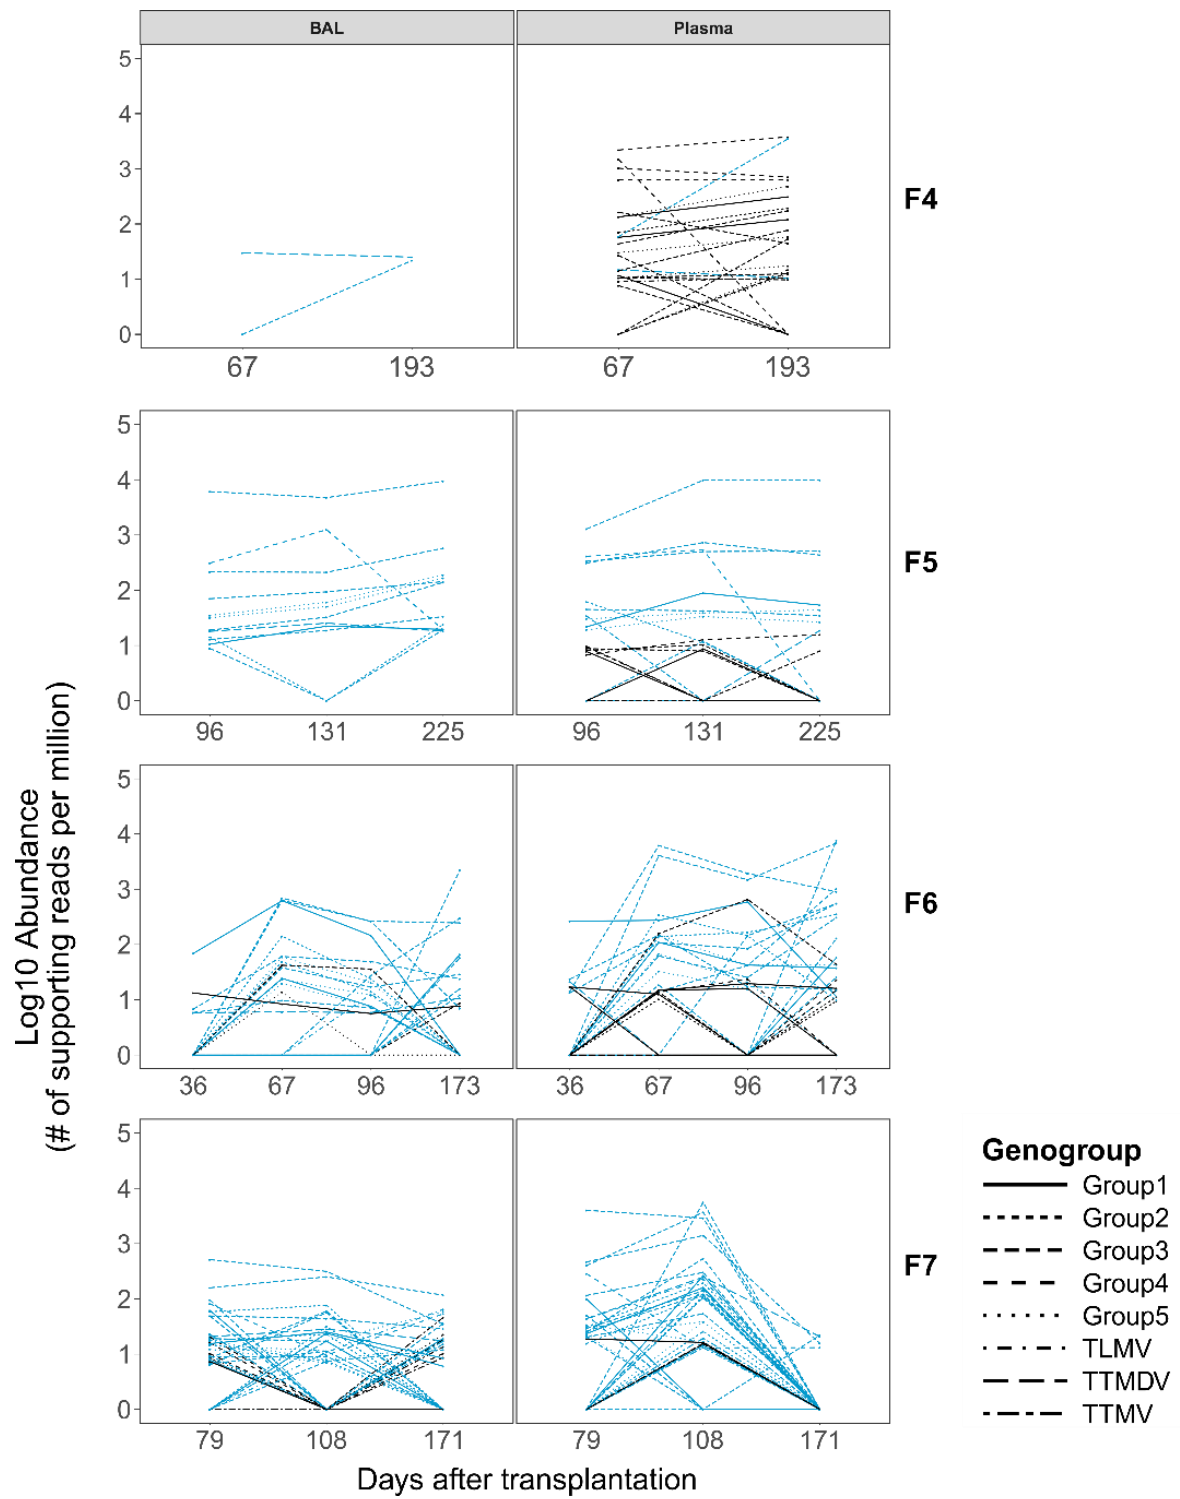

Figure S3. Anellovirus dynamics over time in 4 follow up lung transplant recipients (F4-F7). In blue the strains that occur both in BAL and plasma are displayed.
