# Supplementary material for: Temporal dynamics of the lung and plasma viromes in lung transplant recipients
Source: PLOS journal article supplement (doi:10.1371/journal.pone.0200428), 2018-07-06
Supplement: S7 (10.1371/journal.pone.0200428.s007) [file journal.pone.0200428.s007]

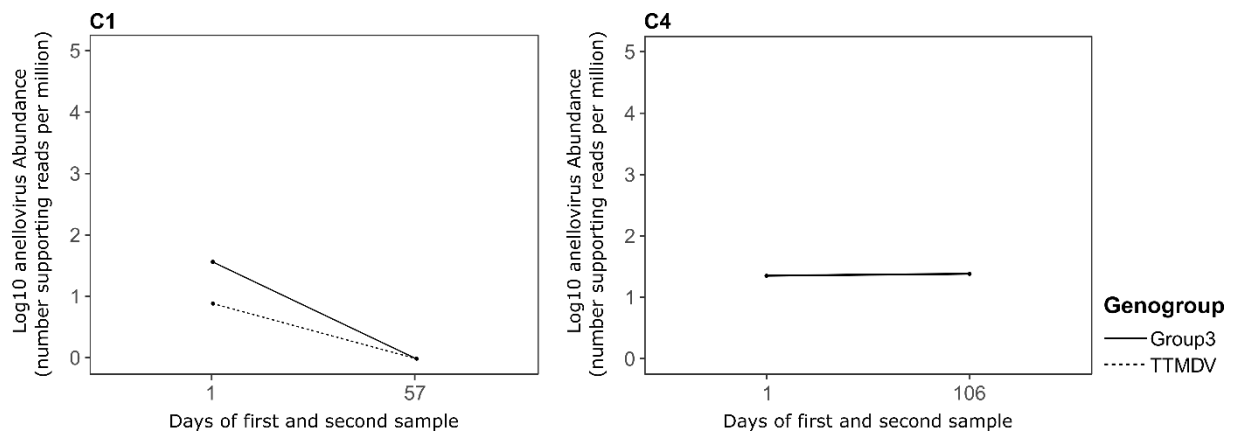

Figure S6. Anellovirus dynamics over time in two plasma samples obtained from healthy controls.
